# Supplementary material
Source: PubMed Central journal article supplement (PMC2804208)
Supplement: supp_M109.042697_jbc.M109.042697-1.pdf [file supp_M109.042697_jbc.M109.042697-1.pdf]

## SUPPLEMENTAL INFORMATION

## SUPPLEMENTAL TABLES

**Table S1. Strains**

| Yeast Strain | Genotype                                                                                                            | Reference       |
|--------------|---------------------------------------------------------------------------------------------------------------------|-----------------|
| BY4741       | <i>MATa his3Δ leu2Δ0 LYS2 met15Δ0 ura3Δ0</i>                                                                        | Open Biosystems |
| <i>bre2Δ</i> | BY4741: <i>MATa his3Δ leu2Δ0 LYS2 met15Δ0 ura3Δ0 bre2Δ::KanMX</i>                                                   | Open Biosystems |
| <i>sdc1Δ</i> | BY4741: <i>MATa his3Δ leu2Δ0 LYS2 met15Δ0 ura3Δ0 sdc1Δ::KanMX</i>                                                   | Open Biosystems |
| MBY1847      | <i>MATa his3Δ200 ade2::hisG leu2Δ0 ura3Δ0 met15Δ0 trp1Δ63 Ty1his3AI-236, Δbre2, Δsdcl</i>                           | (1)             |
| SDBY1116     | <i>bre2Δ</i> with pRS415                                                                                            | This Study      |
| SDBY1117     | <i>bre2Δ</i> with pPFS1                                                                                             | This Study      |
| SDBY1118     | <i>bre2Δ</i> with pPFS3                                                                                             | This Study      |
| SDBY1119     | <i>bre2Δ</i> with pPFS4                                                                                             | This Study      |
| SDBY1120     | <i>bre2Δ</i> with pPFS5                                                                                             | This Study      |
| SDBY1121     | <i>bre2Δ</i> with pPFS6                                                                                             | This Study      |
| SDBY1122     | <i>sdclΔ</i> with pRS415                                                                                            | This Study      |
| SDBY1123     | <i>sdclΔ</i> with pPFS7                                                                                             | This Study      |
| SDBY1124     | <i>sdclΔ</i> with pPFS8                                                                                             | This Study      |
| SDBY1125     | <i>sdclΔ</i> with pPFS9                                                                                             | This Study      |
| SDBY1126     | <i>sdclΔ</i> with pPFS10                                                                                            | This Study      |
| SDBY1127     | <i>sdclΔ</i> with pPFS11                                                                                            | This Study      |
| SDBY1128     | <i>sdclΔ</i> with pPFS12                                                                                            | This Study      |
| SDBY1129     | <i>sdclΔ</i> with pPFS13                                                                                            | This Study      |
| SDBY1130     | <i>sdclΔ</i> with pPFS14                                                                                            | This Study      |
| SDBY1131     | MBY1847 with pRS415 and pRS416                                                                                      | This Study      |
| SDBY1132     | MBY1847 with pRS415 and pPFS45                                                                                      | This Study      |
| SDBY1133     | MBY1847 with pRS415 and pPFS46                                                                                      | This Study      |
| SDBY1134     | MBY1847 with pPFS45 and pPFS43                                                                                      | This Study      |
| SDBY1135     | MBY1847 with pPFS46 and pPFS43                                                                                      | This Study      |
| SDBY1136     | MBY1847 with pRS416 and pPFS43                                                                                      | This Study      |
| SDBY1137     | MBY1847 with pRS416 and pPFS44                                                                                      | This Study      |
| SDBY1138     | MBY1847 with pPFS44 and pPFS45                                                                                      | This Study      |
| SDBY1272     | <i>MATa ade2Δ::hisG his3Δ200leu2Δ0 ura3Δ0 met15Δ0 trp1Δ63 sir2Δ::KANMX4 SET1-N-myc3 Ty1his3AI-236, Δbre2, Δsdcl</i> | This study      |
| SDBY1273     | SDBY1272 with pRS415 and pRS416                                                                                     | This Study      |
| SDBY1274     | SDBY1272 with pRS415 and pPFS1                                                                                      | This Study      |
| SDBY1275     | SDBY1272 with pRS415 and pPFS6                                                                                      | This Study      |
| SDBY1276     | SDBY1272 with pRS416 and pPFS43                                                                                     | This Study      |
| SDBY1277     | SDBY1272 with pRS416 and pPFS47                                                                                     | This Study      |
| SDBY1278     | SDBY1272 with pPFS1 and pPFS43                                                                                      | This Study      |
| SDBY1279     | SDBY1272 with pPFS1 and pPFS47                                                                                      | This Study      |
| SDBY1280     | SDBY1272 with pPFS6 and pPFS43                                                                                      | This Study      |

**Table S2. Plasmids**

| Plasmid  | Inserted Gene               | Promoter     | Vector   | Source     |
|----------|-----------------------------|--------------|----------|------------|
| pRS415   | None                        | <i>ADH1p</i> | pRS415   | (2)        |
| pPRS416  | None                        | <i>ADH1p</i> | pRS416   | (2)        |
| pPFS1    | <i>HA-BRE2</i>              | <i>ADH1p</i> | pRS415   | This Study |
| pPFS2    | <i>HA-SDC1</i>              | <i>ADH1p</i> | pRS415   | This Study |
| pPFS3    | <i>HA-bre2 1-404</i>        | <i>ADH1p</i> | pRS415   | This Study |
| pPFS4    | <i>HA-bre2 Δ410-421</i>     | <i>ADH1p</i> | pRS415   | This Study |
| pPFS5    | <i>HA-bre2 Δ445-474</i>     | <i>ADH1p</i> | pRS415   | This Study |
| pPFS6    | <i>HA-bre2 Δ475-500</i>     | <i>ADH1p</i> | pRS415   | This Study |
| pPFS7    | <i>HA-SDC1</i>              | <i>ADH1p</i> | pRS415   | This Study |
| pPFS8    | <i>HA-sdc1 Δ51-60</i>       | <i>ADH1p</i> | pRS415   | This Study |
| pPFS9    | <i>HA-sdc1 1-120</i>        | <i>ADH1p</i> | pRS415   | This Study |
| pPFS10   | <i>HA-sdc1 Δ131-140</i>     | <i>ADH1p</i> | pRS415   | This Study |
| pPFS11   | <i>HA-sdc1 Δ156-165</i>     | <i>ADH1p</i> | pRS415   | This Study |
| pPFS12   | <i>HA-sdc1 C47A</i>         | <i>ADH1p</i> | pRS415   | This Study |
| pPFS13   | <i>HA-sdc1 Δ146-149</i>     | <i>ADH1p</i> | pRS415   | This Study |
| pPFS14   | <i>HA-sdc1 P146A, P149A</i> | <i>ADH1p</i> | pRS415   | This Study |
| pPFS15   | <i>SDC1</i>                 | T7           | pGEX2T   | This Study |
| pPFS16   | <i>sdc1 1-120</i>           | T7           | pGEX2T   | This Study |
| pPFS17   | <i>sdc1 Δ51-60</i>          | T7           | pGEX2T   | This Study |
| pPFS18   | <i>sdc1 Δ131-140</i>        | T7           | pGEX2T   | This Study |
| pPFS19   | <i>sdc1 Δ156-165</i>        | T7           | pGEX2T   | This Study |
| pPFS20   | <i>sdc1 Δ146-149</i>        | T7           | pGEX2T   | This Study |
| pPFS21   | <i>sdc1 P146A, P149A</i>    | T7           | pGEX2T   | This Study |
| pPFS22   | <i>DPY-30 (Human)</i>       | T7           | pGEX2T   | This Study |
| pPFS23   | <i>dpy-30 Δ77-80</i>        | T7           | pGEX2T   | This Study |
| pET28b-9 | None                        | T7           | pET28b-9 | (3)        |
| pPFS25   | <i>BRE2</i>                 | T7           | pET28b-9 | This Study |
| pPFS26   | <i>bre2 1-404</i>           | T7           | pET28b-9 | This Study |
| pPFS27   | <i>bre2 114-505</i>         | T7           | pET28b-9 | This Study |
| pPFS28   | <i>bre2 1-124</i>           | T7           | pET28b-9 | This Study |
| pPFS29   | <i>bre2 114-404</i>         | T7           | pET28b-9 | This Study |
| pPFS30   | <i>bre2 394-505</i>         | T7           | pET28b-9 | This Study |
| pPFS31   | <i>bre2 Δ130-393</i>        | T7           | pET28b-9 | This Study |
| pPFS32   | <i>bre2 Δ410-421</i>        | T7           | pET28b-9 | This Study |
| pPFS33   | <i>bre2 Δ416-444</i>        | T7           | pET28b-9 | This Study |
| pPFS34   | <i>bre2 Δ445-474</i>        | T7           | pET28b-9 | This Study |

**Table S2. Plasmids continued**

| Plasmid | Inserted Gene                 | Promoter     | Vector   | Source     |
|---------|-------------------------------|--------------|----------|------------|
| pPFS35  | <i>bre2</i> Δ475-500          | T7           | pET28b-9 | This Study |
| pPFS36  | <i>ASH2L</i> (Human)          | T7           | pET28b-9 | This Study |
| pPFS37  | <i>ash2L</i> 156-534          | T7           | pET28b-9 | This Study |
| pPFS38  | <i>ash2L</i> 303-508          | T7           | pET28b-9 | This Study |
| pPFS39  | <i>ash2L</i> 1-508            | T7           | pET28b-9 | This Study |
| pPFS40  | <i>SDC1</i>                   | T7           | pET28b-9 | This Study |
| pPFS41  | <i>sdcl</i> C47A              | T7           | pET28b-9 | This Study |
| pPFS43  | <i>Flag-Sdc1</i>              | <i>ADH1p</i> | pRS415   | This Study |
| pPFS44  | <i>Flag-Sdc1</i> Δ146-149     | <i>ADH1p</i> | pRS415   | This Study |
| pPFS45  | <i>HA-Bre2</i>                | <i>ADH1p</i> | pPRS416  | This Study |
| pPFS46  | <i>HA-Bre2</i> 1-404          | <i>ADH1p</i> | pPRS416  | This Study |
| pPFS47  | <i>Flag-Sdc1</i> L134I, L135I | <i>ADH1p</i> | pRS415   | This Study |
| pPFS48  | <i>sdcl</i> L134E, L135E      | T7           | pGEX2T   | This Study |
| pPFS49  | <i>sdcl</i> L134A, L135A      | T7           | pGEX2T   | This Study |
| pPFS50  | <i>sdcl</i> L134I, L135I      | T7           | pGEX2T   | This Study |
| pPFS51  | <i>bre2</i> Δ445-464          | T7           | pET28b-9 | This Study |
| pPFS51  | <i>bre2</i> Δ464-474          | T7           | pET28b-9 | This Study |
| pPFS52  | <i>BRE2</i>                   | T7           | pGEXKG   | This Study |
| pPFS53  | <i>bre2</i> 445-505           | T7           | pGEXKG   | This Study |
| pPFS54  | <i>bre2</i> 475-505           | T7           | pGEXKG   | This Study |
| pPFS55  | <i>dpy-30</i> L65E, L66E      | T7           | pGEX2T   | This Study |

**Table S3 Primers for QRT-PCR**

| Primer name       | Sequence                     |
|-------------------|------------------------------|
| <i>ACT1</i> -001F | 5' TGGATTCCGGTGATGGTGTT 3'   |
| <i>ACT1</i> -002R | 5' TCAAAATGGCGTGAGGTAGAGA 3' |
| <i>GUA1</i> -01F  | 5' AGTTGGTCGTGGTGACAAGAGA 3' |
| <i>GUA1</i> -02R  | 5' TTGGAATCGTCAATCACCTTCA 3' |
| <i>MDH2</i> -01F  | 5' ACCGGAGCGTTACCCACAT 3'    |
| <i>MDH2</i> -02R  | 5' CCGTTGATGGCTTCTTGTT 3'    |

**Table S4 Primers for ChIP analysis**

| Primer name       | Sequence                            |
|-------------------|-------------------------------------|
| <i>GUA1</i> -001F | 5' GCTATCTTTGATTTGAACGTTCC 3'       |
| <i>GUA1</i> -002R | 5' GGAGTTATCGGAGGTGGCAAT 3'         |
| <i>GUA1</i> -003F | 5' CATGAT CTAGTCTGGAGACAC 3'        |
| <i>GUA1</i> -004R | 5' CATTGACAATTCTTGAGGCGAC 3'        |
| <i>MDH2</i> -001F | 5' GAC TTG TCT CAT ATA GAC ACC 3'   |
| <i>MDH2</i> -002R | 5' CCT TGG AAA GAT CAC AAC ATT C 3' |
| <i>MDH2</i> -003F | 5' CGG TTA TAA GTG TGT TGT CCA A 3' |
| <i>MDH2</i> -004R | 5' GGA GAC GCA AAT TGG CAA CAT 3'   |

**Table S5. *GUA1* and *MDH2* expression**

| Strain       | Plasmid              | <i>GUA1</i> |             | <i>MDH2</i> |             |
|--------------|----------------------|-------------|-------------|-------------|-------------|
|              |                      | RQ          | Fold Change | RQ          | Fold Change |
| Wt           | Vector               | 1.00        |             | 1.00        |             |
| <i>bre2Δ</i> | Vector               | 0.47        | 2.15 ± 0.01 | 0.31        | 3.18 ± 0.03 |
| <i>bre2Δ</i> | <i>BRE2</i> 1-505    | 0.89        | 1.12 ± 0.13 | 0.82        | 1.21 ± 0.06 |
| <i>bre2Δ</i> | <i>bre2</i> 1-404    | 0.35        | 2.87 ± 0.10 | 0.48        | 2.10 ± 0.05 |
| <i>sdc1Δ</i> | Vector               | 0.49        | 2.06 ± 0.07 | 0.34        | 2.94 ± 0.07 |
| <i>sdc1Δ</i> | <i>SDC1</i> 1-175    | 0.78        | 1.28 ± 0.18 | 0.84        | 1.19 ± 0.10 |
| <i>sdc1Δ</i> | <i>sdc1</i> Δ146-149 | 0.36        | 2.78 ± 0.13 | 0.43        | 2.33 ± 0.08 |

**SUPPLEMENTAL REFERENCES**

1. Briggs, S. D., Bryk, M., Strahl, B. D., Cheung, W. L., Davie, J. K., Dent, S. Y., Winston, F., and Allis, C. D. (2001) *Genes & development* **15**, 3286-3295
2. Mumberg, D., Muller, R., and Funk, M. (1995) *Gene* **156**, 119-122
3. Du, H. N., Fingerma, I. M., and Briggs, S. D. (2008) *Genes & development* **22**, 2786-2798

**SUPPLEMENTAL FIGURE LEGEND**

Figure S1. **Alignment of the Dpy-30 domain and SDI domain of different species-** *A*, Alignment of the Dpy-30 domain. *B*, Alignment of the SDI domain.

A Dpy-30 domain

|     |                                                                                                                             |     |                        |
|-----|-----------------------------------------------------------------------------------------------------------------------------|-----|------------------------|
| 121 | QTRKYLNTNVT <sup>**</sup> PHLLAGMRLIAV <sup>*</sup> QQ <sup>*</sup> PEDP <sup>*</sup> LRVVLGEYLI <sup>*</sup> EQSNILKSGEKES | 171 | <i>S. cerevisiae</i>   |
| 52  | P..TRAYLDQTVVPILLQGLAVLAKERPPNP <sup>*</sup> IEFLASYLLKNKAQFED...RN                                                         | 99  | <i>H. sapiens</i>      |
| 52  | P..TRAYLDQTVVPILLQGLAVLAKERPPNP <sup>*</sup> IEFLASYLLKNKAQFED...RN                                                         | 99  | <i>M. musculus</i>     |
| 80  | PEERRIFLEQE <sup>*</sup> VVPILMEGMLGLAREMP <sup>*</sup> RDPIGYLQKFWLDDKHKCDIPLPQN                                           | 133 | <i>D. melanogaster</i> |
|     | p--tRayLdqtvvPiLlqGmavlAkerPp-PiefLasyllknkaqfed---rn                                                                       |     | Consensus              |

Dpy-30 domain PFAM 05186

Dpy-30 domain Dong et al. (2005)

\*\* indicate L134, L135 and P146 and P149 for Sdc1  
and L65, L66, and P77, P80 for DPY-30

B SDI domain

|     |                              |     |                        |
|-----|------------------------------|-----|------------------------|
| 475 | VNTL.DTLYKEQIAEDIVWDIIDELEEQ | 500 | <i>S. cerevisiae</i>   |
| 510 | EHTLADVLYHVETEVDGR.RS.PPWEP  | 534 | <i>H. sapiens</i>      |
| 510 | EHTLADVLYHVETEVDGR.RS.PPWEP  | 534 | <i>M. musculus</i>     |
| 510 | EQCLADTLY.LTEHDGRLRL.DNMGL   | 533 | <i>D. melanogaster</i> |
|     | ehtLaD-LYhvetevDgr-rs-dpwep  |     | Consensus              |

- X non conserved
- X similar
- X conserved
- X all match
